# Supplementary material
Source: Research Square preprint supplement (doi:10.21203/rs.3.rs-9426616/v1)
Supplement: Supplementary file 1 [file c6960af1605b71e4a82af1dc.docx]

**Table 1** Intra-group and inter-group comparisons of balance, speed, and strength performance

| **Group** | **Pre Test** | **Post Test** | | **Change** | **DF** | **F** | **p** |
| --- | --- | --- | --- | --- | --- | --- | --- |
| **X ± SD** | **X ± SD** | | **X ± SD** |
| Two-Legged Balance | | | | | | | |
| VR | 3.51 ± 0.59 | 2.93 ± 0.64 | | -0.58 ± 0.30 | 2-36 | 5.458 | **0.036***  1>3  η2=0.284 |
| **p= 0.001**** | | |
| Traditional | 3.65 ± 0.66 | 3.28 ± 0.79 | | -0.37 ± 0.60 |
| p= 0.076 | | |
| Control | 3.68 ± 0.61 | 3.61 ± 0.77 | | -0.08 ± 0.62 |
| p= 0.723 | | |
| Dominant Leg Balance | | | | | | | |
| VR | 3.33 ± 0.45 | 2.68 ± 0.37 | | -0.65 ± 0.31 | 2-36 | 5.648 | **0.009****  1>2, 1>3  η2=0.295 |
| **p= 0.000**** | | |
| Traditional | 3.35 ± 0.34 | 3.20 ± 0.51 | | -0.15 ± 0.38 |
| p= 0.282 | | |
| Control | 3.35 ± 0.37 | 3.23 ± 0.53 | | -0.12 ± 0.46 |
| p= 0.521 | | |
| Non-Dominant Leg Balance | | | | | | | |
| VR | 3.33 ± 0.56 | 2.76 ± 0.66 | | -0.57 ± 0.47 | 2-36 | 2.114 | 0.163 |
| **p= 0.005**** | | |
| Traditional | 3.53 ± 0.68 | 3.48 ± 0.59 | | -0.05 ± 0.58 |
| p= 0.487 | | |
| Control | 3.73 ± 0.57 | 3.52 ± 0.61 | | -0.21 ± 0.68 |
| p= 0.354 | | |
| Sprint (sec) | | | | | | | |
| VR | 4.16 ± 0.18 | 4.05 ± 0.16 | | -0.11 ± 0.06 | 2-36 | 6.582 | **0.003****  1>3, 2>3  η2=0.276 |
| **p= 0.000**** | | |
| Traditional | 4.21 ± 0.18 | 4.10 ± 0.15 | | -0.11 ± 0.07 |
| **p= 0.002**** | | |
| Control | 4.44 ± 0.24 | 4.39 ± 0.30 | | -0.05 ± 0.06 |
| p= 0.248 | | |
| Dominant Leg Knee Extension Strength (kg) | | | | | | | |
| VR | 29.44 ± 9.14 | | 44.82 ± 9.39 | 15.38 ± 6.14 | 2-36 | 14.234 | **0.000****  1>2, 1>3, 2>3  η2=0.487 |
| **p= 0.000**** | | |
| Traditional | 34.11 ± 6.68 | | 39.24 ± 9.31 | 5.31 ± 9.04 |
| p= 0.082 | | |
| Control | 37.81 ± 7.10 | | 36.05 ± 6.11 | -1.76 ± 6.23 |
| p= 0.160 | | |
| Non-Dominant Leg Knee Extension Strength (kg) | | | | | | | |
| VR | 29.72 ± 7.41 | | 39.06 ± 4.88 | 9.34 ± 7.18 | 2-36 | 2.607 | 0.092 |
| **p= 0.003**** | | |
| Traditional | 32.52 ± 7.73 | | 37.78 ± 10.82 | 5.26 ± 11.82 |
| p= 0.193 | | |
| Control | 37.04 ± 5.89 | | 37.86 ± 6.15 | 0.82 ± 4.21 |
| p= 0.553 | | |

*Significance level (bold)* **p<0.01, *p<0.05, ***VR*** Virtual reality, ***X*** Mean, ***SD*** Standard deviation, ***±*** Plus-minus ***DF*** Degrees of freedom, ***SEC*** Second, ***KG*** Kilogram, ***1*** Virtual reality, ***2*** Traditional, ***3*** Control
